# Supplementary material for: Leaching of Rare Earth Elements from NdFeB Magnets without Mechanical Pretreatment by Sulfuric (H2SO4) and Hydrochloric (HCl) Acids
Source: MDPI journal article supplement (doi:10.3390/min11121374), 2021-12-06
Supplement: s1 [file s1]

Archive with 1 entries (1 files):
- minerals-1464581-supplementary.pdf
