# Supplementary material for: Leaching of Rare Earth Elements from NdFeB Magnets without Mechanical Pretreatment by Sulfuric (H2SO4) and Hydrochloric (HCl) Acids
Source: MDPI journal article supplement (doi:10.3390/min11121374), 2021-12-06
Supplement: s1 [file s1 › minerals-1464581-supplementary.pdf]

## Supplementary material

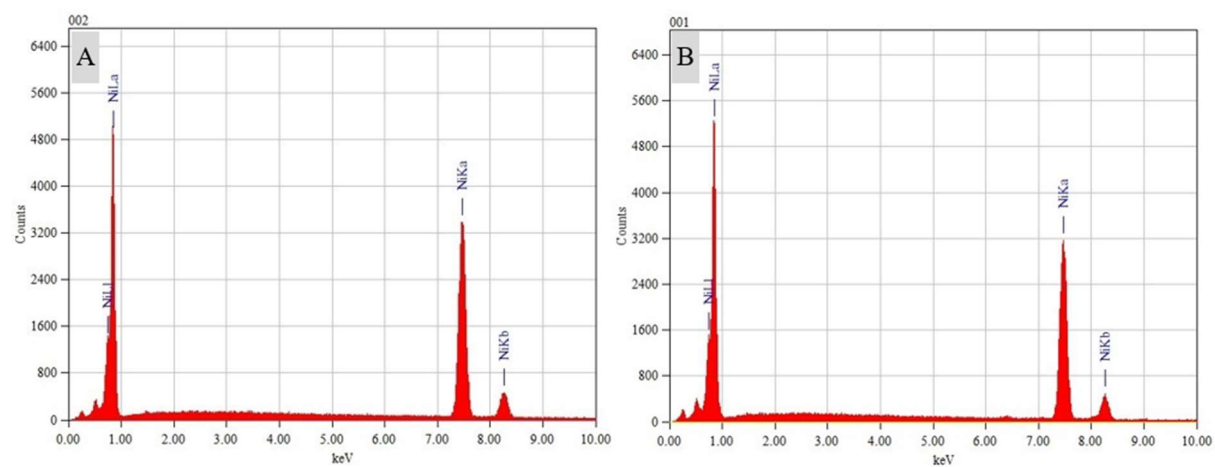

**Figure S1** EDS spectrum of solid residue from leaching process of magnets in 1M H<sub>2</sub>SO<sub>4</sub> (A) and 2 M HCl (B).
